# Supplementary material for: A DNA Repair and Cell-Cycle Gene Expression Signature in Primary and Recurrent Glioblastoma: Prognostic Value and Clinical Implications
Source: Oxford University Press journal article supplement (doi:10.1158/0008-5472.can-18-2076), 2019-01-23
Supplement: 00085472can182076-sup-204821_3_supp_5251213_pkp839.xlsx [file 00085472can182076-sup-204821_3_supp_5251213_pkp839.xlsx]

## Sheet: Heidelberg cohort
PatientID	State	OS	PFS	Event	Groups	TMZ	Age	CENPF	UBE2T	CDC25C	CCNA2	CCNB1	TOP2A	CENPA	PTTG1	MKI67	AURKB	CDK1	PLK1	CDC6	NEIL3	UBE3B	PCLAF	EME1	FANCD2	MUS81	POLM	ERCC3	ERCC4	AURKA	RAD54B	RAD54L	POLQ	RAD51
5	primary	41	9	1	G3	positive	53.9616	657.247	702.918	177.05	569.848	632.963	2319.26	426.399	2366.2	114.241	246.637	656.767	192.467	98.5853	163.407	226.169	12627.4	116.8	405.54	319.417	135.121	263.518	104.114	662.666	160.787	179.312	194.697	188.616
5	recurrence	31	6	1	G1	negative	54.7781	116.093	148.398	91.3218	111.426	117.37	121.528	98.1921	218.278	79.3739	94.5033	102.88	104.195	82.5819	85.3661	323.435	13283.4	84.2773	118.341	333.784	140.024	264.863	109.126	135.282	131.54	100.93	93.6075	252.214
6	primary	28	7	1	G3	positive	32.663	400.884	596.303	111.902	338.512	306.941	1100.05	199.116	1428.97	96.84	165.712	686.16	137.797	99.5601	118.59	289.879	10557.7	124.435	305.489	334.771	170.201	235.342	96.8736	328.698	178.826	196.295	171.002	196.971
6	recurrence	20	3	1	G3	negative	33.3151	334.664	1211.55	176.25	645.289	694.246	2078.78	440.944	1765.18	96.3748	324.428	1173.8	186.657	87.3734	183.979	187.785	14799.2	93.2054	513.405	456.837	149.296	271.624	102.311	695.228	194.06	211.043	230.891	294.469
7	primary	43	8	1	G3	positive	20.4411	1153.63	1190.8	273.05	608.815	775.832	5120.33	695.228	5303.13	152.519	769.27	1302.11	218.932	97.4995	165.588	207.772	15856.5	173.948	366.201	317.706	127.883	497.239	117.425	969.188	238.466	266.549	185.702	215.928
7	recurrence	24	20	1	G1	negative	21.9589	106.637	227.517	80.0441	116.137	134.046	102.533	86.1924	177.71	89.1807	89.0247	108.575	107.236	90.8771	86.901	268.552	16445.9	110.45	118.052	246.218	123.885	453.793	99.0304	131.258	119.811	110.981	104.451	164.258
11	primary	80	23	1	G3	positive	43.8438	207.948	208.753	90.9086	194.016	163.274	367.779	105.537	916.116	90.8408	97.0633	222.18	119.105	86.633	119.012	209.702	14621.7	99.1221	188.177	291.286	112.356	307.606	100.368	208.82	165.204	110.422	115.397	245.105
11	recurrence	57	3	1	G3	negative	45.7836	423.007	278.45	126.029	300.289	188.916	820.568	192.98	1492.94	96.3908	143.135	280.253	105.985	88.1896	134.042	280.616	14276	131.702	287.353	311.041	134.368	293.68	101.606	263.039	143.558	163.386	186.101	307.972
12	primary	73	40	1	G3	positive	56.5589	288.45	338.096	113.36	379.63	222.968	681.829	202.544	1118.93	91.1111	172.37	381.252	119.018	95.8763	101.355	227.811	11578.9	102.281	265.567	385.691	157.438	296.713	115.397	381.454	126.296	145.183	154.912	179.248
12	recurrence	33	15	1	G3	negative	59.8959	745.318	478.074	142.447	309.736	200.258	695.589	178.123	1005.58	100.291	232.365	278.066	120.922	84.3132	120.07	266.221	11173.2	107.853	248.3	481.539	177.86	351.473	109.297	305.275	127.738	223.866	284.601	396.901
13	primary	30	18	1	G3	positive	40.8685	222.091	901.015	148.59	417.267	276.766	2338.57	362.423	2232.33	130.551	412.856	439.278	199.92	86.8916	150.708	196.5	10416	127.721	514.591	314.392	151.825	443.604	120.727	590.751	195.951	166.003	149.46	199.65
13	recurrence	11	1	1	G3	negative	42.4356	309.892	406.102	130.942	292.991	319.75	1368.33	164.169	901.307	99.5548	170.393	218.78	105.569	101.262	121.996	266.339	10583.3	115.343	359.577	270.129	156.352	285.319	106.161	352.821	141.755	146.154	178.318	297.118
14	primary	9	3	1	G2	positive	58.6904	296.916	273.952	130.598	258.791	203.535	1077.43	240.624	806.707	109.69	231.538	223.612	122.198	90.5018	108.718	203.895	13669.8	131.044	144.707	468.761	246.637	447.904	114.512	448.146	193.353	174.455	152.743	177.41
14	recurrence	6	2	1	G1	negative	58.9726	151.48	132.238	97.9697	193.308	125.243	502.785	123.453	423.607	95.4739	150.493	170.014	108.38	92.6466	90.6667	292.991	12657.9	95.1127	117.922	341.826	193.054	427.754	104.241	241.814	151.389	117.469	110.085	136.802
15	primary	7	4	1	G3	negative	67.7671	539.873	699.529	196.5	606.297	323.493	2322.34	396.67	2003.87	162.708	739.575	434.662	125.077	98.9336	218.992	293.539	14072.7	138.238	407.005	332.307	243.027	466.093	102.386	1386.28	163.659	272.693	251.641	179.271
15	recurrence	3	3	1	G3	negative	68.1342	367.815	1198.63	177.617	501.925	444.84	1561.35	515.482	2327.17	92.6654	582.575	762.972	134.298	85.6429	224.851	216.166	12906.9	118.781	284.414	293.127	174.27	412.623	110.467	1069.46	186.645	216.851	196.684	167.878
16	primary	26	12	1	G1	positive	44.8384	174.119	217.781	104.645	196.198	144.434	620.311	137.991	783.13	89.0725	175.466	202.373	108.804	91.9843	95.7429	295.338	15071.5	104.149	174.709	340.599	197.774	448.905	103.203	281.218	102.249	124.128	118.121	198.642
16	recurrence	13	3	1	G1	negative	45.8877	131.014	186.344	97.0292	168.613	142.646	519.652	127.696	367.481	86.8132	126.83	167.7	99.0524	86.5962	92.5813	270.253	14358.8	106.553	124.271	418.503	237.519	476.703	120.475	169.091	130.739	118.691	104.588	145.887
17	primary	38	32	1	G3	positive	50.8438	280.007	296.319	108.142	324.989	253.408	750.992	215.25	1476.06	106.101	201.87	499.22	137.732	87.3582	111.079	254.009	13992.7	110.383	241.606	277.128	133.083	285.401	115.577	417.907	133.382	137.119	222.147	292.851
17	recurrence	6	6	1	G1	negative	53.5205	138.613	143.967	87.4393	146.591	104.565	172.049	127.434	548.441	93.2309	94.5033	100.938	108.867	106.556	92.6971	283.693	14799.2	102.065	95.7297	315.728	178.744	263.721	90.8255	143.672	98.5633	92.9434	118.491	680.597
18	primary	18	15	1	G1	positive	71.9479	265.016	219.15	89.9881	146.012	185.338	312.691	110.368	720.426	94.7024	127.438	137.538	103.602	82.9146	95.1574	296.219	15464	101.713	176.614	218.322	143.821	390.498	110.329	171.301	128.965	128.267	121.171	287.353
18	recurrence	2	2	1	G3	negative	73.2685	478.074	303.455	103.436	255.221	344.337	886.378	194.429	1857.29	87.5867	175.149	254.131	120.822	87.4752	103.664	263.474	12596.7	109.743	166.956	349.49	142.131	389.647	98.5153	336.505	139.594	145.195	129.116	285.319
19	primary	9	6	1	G2	positive	66.2	426.399	251.754	113.706	227.878	208.363	428.323	158.182	1577.75	103.143	118.018	378.24	130.342	97.1367	95.2532	266.678	14236.1	110.428	195.951	335.179	155.961	315.359	102.315	238.483	145.937	126.949	150.465	244.582
19	recurrence	2	2	1	G3	negative	66.7562	643.671	451.308	105.384	309.478	237.01	783.348	189.785	1650.22	109.736	173.021	444.049	137.675	90.871	104.325	214.071	14881.7	128.481	278.623	312.691	132.407	269.06	96.8645	303.878	136.88	138.933	182.676	239.564
21	primary	14	10	1	G3	positive	79.1589	371.694	393.147	146.08	422.69	382.031	1452.62	267.957	978.928	113.462	206.361	511.873	144.761	98.2665	121.554	265.063	14313.8	119.398	178.847	317.874	171.322	430.884	110.814	636.501	147.528	154.961	158.224	163.554
21	recurrence	0	0	1	G3	negative	80.3288	342.223	249.099	125.071	356.842	323.493	1181.6	197.604	768.435	98.9867	224.743	390.059	141.089	102.279	127.097	269.761	14358.8	122.626	182.037	278.087	205.49	477.252	102.436	400.465	152.611	166.112	149.335	183.386
24	primary	33	17	1	G3	positive	68.5014	782.92	503.959	121.701	296.713	418.659	1169.83	325.048	2331.95	102.679	273.399	366.526	125.426	99.4555	139.153	264.941	14881.7	124.594	251.481	254.203	159.26	483.852	103.011	425.003	137.986	166.029	144.884	261.374
24	recurrence	12	2	1	G3	negative	70.2795	606.13	1117.8	185.922	493.236	313.041	1137.93	352.315	3529.35	106.933	421.738	352.968	160.451	91.2895	132.058	225.24	14481.4	147.979	339.242	348.152	137.075	590.237	112.08	538.211	139.753	206.948	169.376	394.717
25	primary	61	36	1	G3	positive	59.5397	229.714	359.085	143.393	326.839	389.95	875.986	199.145	1087.82	84.6608	164.591	397.535	120.538	86.378	114.81	259.482	10469.1	109.727	262.018	392.264	148.551	345.927	96.8003	318.736	137.204	152.662	129.777	208.972
25	recurrence	15	5	1	G1	negative	63.3315	120.385	174.773	84.7285	98.0302	119.529	129.125	80.5845	229.456	89.9738	90.2454	106.538	86.897	88.7887	82.8406	341.141	12876.2	103.1	120.099	348.736	147.938	271.844	102.348	139.959	97.7634	112.153	104.742	241.566
26	primary	12	6	1	G3	positive	49.0548	318.487	278.672	109.148	243.678	238.167	618.392	160.871	1555.62	100.95	197.628	285.274	115.951	83.0814	113.619	255.459	12184	102.77	188.729	236.576	137.573	402.494	97.4892	342.866	152.568	150.614	128.3	202.611
26	recurrence	6	2	1	G1	negative	49.6192	187.4	186.574	94.341	169.896	143.973	310.468	99.5191	1029.5	102.42	115.734	158.06	122.454	80.1729	96.4592	257.648	13592.4	99.1613	160.633	269.892	164.591	449.165	108.039	227.187	111.314	134.933	114.033	328.403
29	primary	18	5	1	G3	negative	66.5808	557.517	829.392	170.711	525.1	364.119	1110.75	292.943	3920.09	132.039	416.26	398.065	133.392	113.086	148.07	250.514	11371.5	120.671	175.369	220.202	160.008	518.7	105.035	658.619	120.975	277.446	180.83	219.93
29	recurrence	12	3	1	G3	negative	67.0548	481.154	558.137	136.088	312.386	226.675	846.149	228.973	2803.49	105.057	242.075	347.152	144.666	101.37	110.702	290.07	12689.4	119.227	208.531	251.937	151.338	532.423	111.534	414.627	150.995	270.328	195.258	254.886
30	primary	53	43	1	G3	positive	52.7452	677.369	518.24	132.72	317.921	509.517	1337.1	252.237	1449.32	106.779	187.291	442.652	137.98	91.6052	133.352	299.487	11749.8	106.748	292.513	415.086	161.387	320.37	104.562	579.15	167.467	160.751	172.214	261.766
30	recurrence	10	7	1	G3	negative	56.3288	373.632	334.831	138.524	286.708	415.62	865.239	239.098	1208.22	95.3518	150.343	331.018	108.564	99.1981	124.736	278.984	9849.07	103.388	276.292	294.534	147.417	288.918	121.278	482.498	146.783	145.825	159.792	215.36
31	primary	24	10	1	G3	positive	63.8877	239.025	322.789	112.828	240.927	417.097	887.779	253.448	1487.28	95.6533	182.492	410.945	129.588	96.5094	107.551	217.129	11578.9	117.503	285.401	284.865	154.009	317.553	99.6893	393.544	179.762	156.695	133.582	150.109
31	recurrence	5	2	1	G3	negative	65.4466	349.161	436.811	154.48	364.853	448.48	1058.31	302.975	1807.3	103.296	205.976	486.228	135.266	89.886	131.258	216.282	13150.3	130.292	362.623	348.536	133.647	346.341	108.599	490.723	157.639	159.313	206.693	280.715
32	primary	21	6	1	G3	negative	59.2712	369.46	367.987	107.133	313.524	320.701	882.814	196.21	1097.28	106.345	172.933	398.767	112.922	86.3773	105.516	259.285	13837.8	104.651	269.584	325.216	168.054	281.884	105.177	413.02	147.58	126.474	135.515	170.579
32	recurrence	15	6	1	G1	negative	59.8301	108.154	147.026	87.2608	123.111	125.385	122.202	97.9367	185.358	85.771	79.889	117.924	92.1103	88.7155	94.4642	344.692	10767.8	87.7548	134.351	310.667	143.155	285.233	108.028	150.316	110.926	123.041	106.764	265.679
33	primary	15	4	1	G3	positive	37.8877	496.041	546.382	141.841	395.08	297.118	1411.66	331.963	1316.99	102.152	245.569	598.779	142.142	86.1066	138.377	230.909	14111.5	123.572	254.886	244.671	166.779	357.911	108.407	575.227	158.557	189.808	173.063	146.85
33	recurrence	11	5	1	G1	negative	38.2904	123.266	151.555	88.8279	122.476	108.793	200.238	104.982	340.663	86.6898	117.018	126.561	98.4536	88.5841	86.5092	280.276	15019.7	111.337	116.178	272.773	177.963	412.547	102.345	179.331	113.956	101.518	110.59	183.587
34	primary	83	43	1	G1	positive	53.937	290.826	231.946	115.646	224.95	262.322	431.286	122.571	483.852	105.376	113.05	193.147	107.227	89.1909	108.523	433.289	12153.9	135.94	424.414	741.193	280.165	363.339	99.0008	243.335	188.594	199.258	227.121	421.112
34	recurrence	39	14	1	G3	negative	57.5863	306.675	298.438	115.254	242.816	294.955	611.269	132.426	563.586	91.3729	128.8	274.333	109.635	90.9573	120.828	287.494	12153.9	103.409	314.716	332.827	164.892	259.876	103.698	269.06	169.131	146.184	130.598	201.439
35	primary	15	5	1	G1	positive	56.8438	282.066	268.552	116.8	235.746	193.191	555.446	163.407	861.855	88.8731	188.084	262.797	130.83	93.0572	94.4922	299.333	13877.2	118.349	175.447	303.984	201.333	425.625	108.303	332.827	169.429	143.61	160.366	218.003
35	recurrence	9	5	1	G3	negative	57.2986	403.51	834.897	381.252	1009.3	879.104	2209.69	817.62	3826.28	128.863	1374.8	1240.85	316.249	98.8843	159.431	248.355	10986.5	194.96	796.331	349.85	232.975	457.011	91.422	1263.38	216.974	363.539	366.454	177.586
36	primary	21	11	1	G3	negative	47.6521	564.971	296.319	154.248	250.919	316.22	941.636	195.482	1193.13	141.931	339.404	237.762	130.393	89.6843	111.452	353.466	13186.5	133.778	443.31	338.388	164.386	393.544	100.588	414.177	106.844	171.995	110.236	157.704
36	recurrence	10	10	1	G3	negative	48.5918	513.922	311.617	135.49	197.839	224.743	1113.5	142.293	844.107	110.418	190.798	196.446	113.643	90.3959	90.3201	315.458	13592.4	118.932	292.422	295.494	146.916	394.794	98.3923	286.286	118.317	165.431	155.553	141.269
37	primary	17	5	1	G3	negative	69.137	338.451	418.741	140.84	333.496	264.685	994.271	220.772	1313.02	105.872	225.783	413.319	138.721	93.3299	123.489	224.592	13715.8	116.066	289.09	254.009	169.191	374.125	115.709	566.38	140.095	152.047	155.865	184.907
37	recurrence	12	7	1	G1	negative	69.5589	117.955	177.743	85.9483	98.8082	105.291	109.846	86.0746	240.495	93.6923	88.3882	98.5159	93.6889	102.348	101.109	302.2	16108.3	97.4952	127.742	275.814	121.724	398.45	114.43	145.937	115.927	110.113	99.8952	168.037
39	primary	82	39	1	G3	positive	63.0329	366.265	275.606	107.038	248.053	323.062	811.84	151.338	832.846	87.2753	111.159	272.119	114.441	95.3108	106.762	330.902	8998.98	95.7563	186.904	292.751	139.675	213.74	107.518	266.844	120.405	137.381	142.812	223.643
39	recurrence	42	18	1	G3	negative	66.3315	184.44	464.496	124.508	190.183	259.285	530.32	179.513	1123.12	88.9437	116.591	386.853	126.268	85.963	130.342	254.729	10361.4	98.7285	212.283	413.171	164.988	292.513	96.7104	271.588	128.19	136.353	136.738	234.191
41	primary	78	33	1	G3	positive	61.6438	418.246	300.593	135.994	235.814	313.413	1106.37	200.384	848.637	109.906	227.42	326.033	137.652	95.7188	111.445	238.402	13913.2	118.983	245.505	266.384	148.521	454.97	103.793	417.907	196.369	143.382	145.005	166.58
41	recurrence	45	10	1	G3	negative	64.4219	591.661	330.728	134.723	356.091	398.69	1468.13	253.448	947.947	114.464	254.09	386.467	142.142	99.365	126.669	252.007	15212.4	128.611	296.076	297.463	155.023	438.363	103.924	550.756	142.915	152.329	165.012	223.405
42	primary	35	3	1	G1	positive	67.7014	120.856	264.409	87.4692	110.901	150.103	109.464	89.0396	218.338	89.8157	86.2999	104.399	89.44	90.6073	91.5514	411.524	11146.9	88.2358	161.619	432.668	181.956	536.841	109.122	123.115	100.674	116.969	104.927	445.772
42	recurrence	32	25	1	G1	negative	68.0164	108.274	194.45	83.5032	109.042	110.984	103.809	82.7149	229.057	87.8874	90.3756	98.9713	85.1442	88.5677	102.163	306.732	12054.4	90.2809	105.18	290.699	125.811	290.603	100.441	124.136	120.093	109.498	93.0503	359.27
43	primary	41	23	1	G3	positive	42.5425	355.264	339.019	115.509	241.787	275.778	592.783	187.739	1902.22	94.4955	126.638	288.725	108.325	86.0152	110.679	156.335	12843.8	91.3373	240.357	281.5	131.521	316.673	105.337	288.365	134.672	145.868	131.344	204.594
43	recurrence	15	4	1	G3	negative	44.737	603.224	480.824	134.059	483.016	473.626	1079.64	405.013	4405.49	88.6966	231.52	550.255	164.128	89.6142	184.371	167.357	13669.8	138.202	294.424	371.988	133.322	263.115	108.853	574.787	219.538	159.376	217.969	207.578
44	primary	19	5	1	G2	positive	65.2274	800.11	352.207	119.419	234.468	280.896	1295.05	166.356	778.47	107.083	199.543	191.173	117.985	85.3005	117.038	387.308	10711.9	110.089	242.251	285.233	168.054	305.226	118.233	320.639	166.039	186.258	184.506	481.748
44	recurrence	14	6	1	G1	negative	65.6685	147.663	131.921	93.0447	118.688	123.46	195.93	92.9244	293.68	91.8563	118.913	114.898	109.945	87.1509	89.3752	422.767	11467	89.4227	144.749	404.773	213.658	358.16	111.781	152.047	133.26	113.679	130.282	978.576
45	primary	24	19	1	G1	positive	38.8877	143.243	200.644	100.59	143.962	140.052	238.263	118.145	438.467	94.8131	120.448	154.177	102.44	89.3724	88.1736	321.696	10260.2	95.2354	166.934	277.715	200.11	432.895	112.187	246.962	146.972	127.106	120.507	149.556
45	recurrence	5	4	1	G1	negative	40.4849	126.486	209.397	96.948	148.791	172.152	252.699	110.446	693.179	89.5051	118.971	191.437	98.7422	93.5941	97.0424	320.701	10583.3	107.225	147.857	298.489	232.931	452.515	111.65	248.107	121.888	104.99	117.814	168.298
46	primary	19	3	1	G2	positive	58.6932	197.196	211.722	100.817	171.995	243.646	471.051	157.696	503.629	88.0365	126.328	226.735	113.18	85.1374	90.7838	230.385	16265.6	109.399	153.557	251.833	200.214	355.393	100.503	246.816	142.383	109.759	116.767	159.413
46	recurrence	11	2	1	G1	negative	59.3671	157.452	155.192	89.5635	114.102	148.052	173.131	97.9591	194.767	95.6395	84.7088	118.875	101.232	87.2108	93.2288	266.468	15572.1	98.5601	114.536	291.982	209.059	419.557	109.413	182.57	128.227	123.505	107.151	157.22
47	primary	19	9	1	G3	positive	59.0137	711.359	378.178	225.256	614.591	673.556	2855.78	276.168	1079.64	106.319	284.463	879.323	142.281	97.3033	234.022	209.958	15119	137.726	184.197	283.217	231.137	743.758	121.343	641.377	223.674	214.25	163.823	145.619
47	recurrence	10	2	1	G1	negative	59.7616	271.744	182.191	104.089	208.45	216.424	665.287	142.344	870.532	103.935	136.479	238.586	110.079	94.2901	111.663	309.892	12689.4	111.724	129.978	333.842	219.353	494.165	113.052	261.527	175.846	124.947	130.551	153.018
48	primary	21	13	1	G3	positive	58.9753	578.754	348.04	128.42	319.691	214.266	856.879	187.739	2022.93	109.471	256.001	267.587	148.111	86.5197	127.487	293.492	12534.1	137.942	242.47	346.634	155.841	409.575	104.748	400.848	134.211	177.387	184.966	350.263
48	recurrence	8	4	1	G1	negative	60.0685	298.201	257.246	93.4074	182.492	216.006	465.726	130.575	968.174	98.6716	165.989	149.811	113.018	96.2182	98.6315	280.896	15626.7	98.2885	155.753	262.779	149.643	429.576	96.7384	240.996	110.906	131.492	122.544	267.604
50	primary	41	17	1	G3	positive	60.0274	306.891	310.188	101.251	200.409	260.823	670.691	183.279	628.337	98.1482	120.758	247.638	135.169	86.6767	113.348	228.725	14313.8	106.017	153.234	246.371	169.04	424.66	110.143	331.467	168.613	137.797	135.599	161.61
50	recurrence	24	6	1	G3	negative	61.463	754.508	457.011	171.591	455.76	369	2133.83	351.021	1268.6	124.337	277.842	456.224	138.383	97.2024	134.338	269.019	14621.7	127.2	269.931	291.684	170.984	491.559	100.303	576.509	145.069	204.411	171.389	213.287
52	primary	5	2	1	G3	negative	73.989	414.55	998.341	187.389	416.92	445.231	2095.92	372.116	2923.6	126.445	320.312	399.14	140.482	91.8796	155.211	283.539	15464	132.019	404.305	313.068	158.38	475.694	105.402	1077.07	171.861	204.02	193.73	305.629
52	recurrence	2	2	1	G1	negative	74.2356	152.239	270.86	81.1681	156.745	149.096	159.084	102.537	567.136	84.8299	101.198	113.864	83.1679	87.4764	94.2193	367.252	15418.8	106.546	133.816	297.213	151.501	475.353	103.667	261.102	127.857	114.047	104.586	267.705
53	primary	18	13	1	G2	negative	67.8932	264.178	263.878	97.2071	180.483	215.691	494.113	160.103	1610.22	101.084	172.727	210.075	114.089	87.0779	110.555	267.418	14754.3	99.6778	191.739	267.78	152.169	482.909	105.504	225.3	142.131	132.155	125.243	252.007
53	recurrence	5	1	1	G1	negative	69.0055	275.814	141.725	87.1239	212.044	192.249	260.14	93.9289	506.487	104.456	177.365	99.5519	136.978	86.0716	87.5059	382.604	12876.2	118.338	151.578	764.24	303.069	401.965	92.8089	221.952	134.528	185.045	170.283	1908.77
55	primary	14	6	1	G3	negative	77.263	268.395	474.051	118.712	300.164	267.095	779.334	236.71	1976.41	92.9878	194.767	498.493	133.053	88.1267	125.17	174.926	12184	118.965	297.27	270.643	131.192	299.227	97.1222	371.621	196.634	168.318	185.752	246.291
55	recurrence	7	1	1	G1	negative	77.811	169.058	220.202	88.132	135.006	131.526	208.718	97.8991	528.07	87.2781	98.2479	111.167	100.144	88.387	92.3408	227.468	14434.6	88.9911	128.547	224.297	120.01	301.522	102.078	136.158	123.791	113.927	119.183	265.679
56	primary	14	5	1	G3	negative	73.263	460.705	460.095	111.838	246.179	320.816	1151.9	272.48	2141.88	91.8075	160.751	361.9	159.889	87.4688	121.586	230.64	14799.2	112.463	292.751	356.269	153.102	410.873	105.877	380.898	219.18	137.52	214.85	182.511
56	recurrence	2	2	1	G3	negative	74.2658	633.259	434.997	110.622	223.149	292.851	951.021	217.969	2841.43	89.7815	235.342	354.192	99.7559	90.8635	132.421	244.176	15164.8	112.273	253.87	282.999	152.102	296.366	120.818	346.194	169.091	192.942	195.01	179.503
57	recurrence	5	2	1	G3	positive	78.526	482.444	408.976	142.679	340.068	360.924	1130.9	244.709	1491.45	100.472	204.867	515.609	139.119	93.8728	132.487	180.474	14434.6	96.7035	251.682	276.637	121.514	287.455	111.877	415.935	133.165	149.921	176.509	186.279
57	primary	16	11	1	G2	negative	77.5945	335.288	361.767	102.631	239.848	203.981	693.923	174.665	1099.49	90.1485	172.077	297.89	116.951	81.1005	101.241	239.259	14754.3	97.4443	178.567	259.798	127.396	292.377	107.13	270.328	143.194	130.683	118.08	1110.75
58	primary	15	9	1	G3	positive	51.2274	582.426	777.817	118.491	328.061	370.858	1085.8	335.117	2862.59	93.8357	264.01	517.985	142.975	85.7668	161.396	183.673	14621.7	142.812	361.05	224.835	116.664	413.02	103.376	399.363	227.909	171.924	186.738	216.382
58	recurrence	6	1	1	G3	negative	51.9945	240.795	267.587	95.2433	192.467	199.306	429.335	159.913	1498.64	85.4614	164.753	325.101	97.1739	88.4361	138.334	204.752	14358.8	100.895	179.989	323.286	130.515	374.19	107.246	289.126	133.601	130.551	160.139	175.582
67	primary	14	5	0	G3	positive	36.1096	546.382	387.157	124.7	221.013	289.475	902.177	249.794	1607.6	91.2955	146.276	252.459	123.999	92.3995	122.746	299.69	13223.1	104.558	255.221	231.769	112.125	362.562	94.0284	333.528	170.704	134.131	137.304	205.133
67	recurrence	8	5	0	G1	negative	36.5534	133.067	174.24	92.7941	106.835	106.302	91.617	91.5415	542.748	81.9449	77.9998	110.008	84.2783	92.0349	85.2481	333.314	15513.9	108.802	134.62	273.014	146.024	368.724	109.464	172.943	134.145	113.346	103.109	234.744
68	primary	73	38	1	G1	positive	77.1534	159.133	252.865	95.1439	115.009	167.7	193.007	105.555	390.201	77.0829	98.0756	112.842	83.5918	84.2556	94.7624	245.886	15212.4	92.6787	113.473	209.69	122.567	379.556	113.782	144.2	128.755	108.162	102.954	179.037
68	recurrence	20	6	1	G3	negative	81.6329	304.858	284.69	117.43	245.027	224.788	724.922	160.904	1567.19	94.8431	156.141	273.583	95.9993	93.719	106.973	272.773	12657.9	138.099	223.674	254.647	144.766	294.118	103.245	312.875	155.545	136.873	135.679	189.24
69	primary	31	7	1	G3	positive	38.9479	603.65	442.186	174.386	343.045	292.074	1050.73	236.71	1707.95	115.803	312.901	427.1	146.263	98.3292	120.878	228.793	13592.4	120.433	314.667	340.786	147.528	394.652	93.7827	486.436	168.621	170.251	202.324	184.371
69	recurrence	23	5	1	G3	negative	39.5507	532.321	328.403	122.411	254.009	286.333	1111.52	203.785	1787.78	98.9727	182.631	304.748	150.336	94.7126	116.284	287.103	13510.4	128.716	237.157	320.043	153.16	347.415	123.07	357.475	156.327	134.164	152.135	199.711
70	primary	11	6	0	G3	positive	47.789	304.329	323.393	113.059	243.44	301.429	827.626	181.689	1677.87	103.264	210.872	299.333	125.422	102.313	118.59	273.399	13669.8	109.491	275.994	277.628	149.243	382.289	100.915	391.46	132.029	162.279	206.743	195.092
70	recurrence	5	5	0	G1	negative	48.3068	111.979	131.751	74.9216	120.371	138.22	173.191	97.6692	590.6	95.4685	96.6161	111.003	120.589	87.4296	95.0394	288.057	12500.4	105.443	148.49	273.999	145.697	378.866	87.3762	136.606	137.392	114.422	105.347	210.653
71	primary	17	14	0	G3	negative	81.4411	692.14	499.834	232.975	340.912	439.004	1314.68	395.376	2248.49	127.287	262.573	370.942	167.825	108.708	141.522	214.058	12025.5	121.656	278.322	251.444	133.392	448.315	101.113	491.502	171.776	271.924	204.971	232.024
71	recurrence	3	3	0	G3	negative	82.6137	328.521	361.703	93.8264	182.852	186.574	722.297	155.484	1980.96	96.6828	137.428	219.723	98.9198	86.8334	112.965	271.467	15212.4	103.045	154.239	214.779	121.806	415.461	99.7031	195.482	121.586	123.693	136.338	172.576
